# Supplementary material for: A sensitive, switchable and biocompatible surface enhanced Raman scattering-fluorescence dual mode probe using bipyramid gold nanocrystal-gold nanoclusters for high-throughput biodetection
Source: Royal Society of Chemistry journal article supplement (doi:10.1039/c3ay41966e), 2014-01-01
Supplement: c3ay41966e1.pdf [file c3ay41966e1.pdf]

## Support material:

A sensitive, switchable and biocompatible surface enhanced Raman scattering-fluorescence dual mode probe using bipyramid gold nanocrystal-gold nanoclusters for high-throughput biodetection

Zhou Xiaoyan,<sup>a</sup> Li Ruiyi,<sup>b</sup> Wu Xiaofei,<sup>a</sup> Li Zaijun <sup>a\*</sup>

<sup>a</sup>School of Chemical and Material Engineering, Jiangnan University, Wuxi, 214122, China;

<sup>b</sup>The University of Birmingham, Edgbaston, Birmingham, B15 2TT, United Kingdom

\*Corresponding author, Fax: +86 5105811863, and e-mail address: zaijunli@263.net (L. Zaijun).

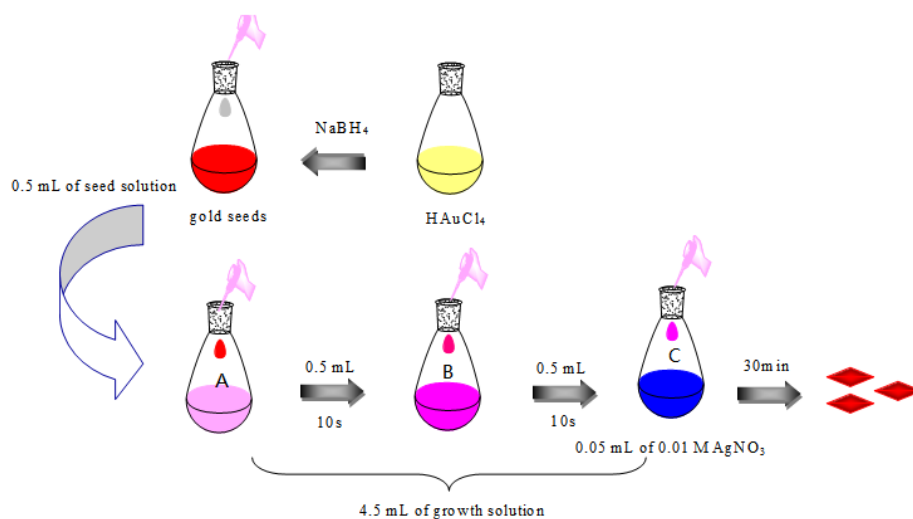

**Fig.S1** Procedure for the synthesis of BPGN

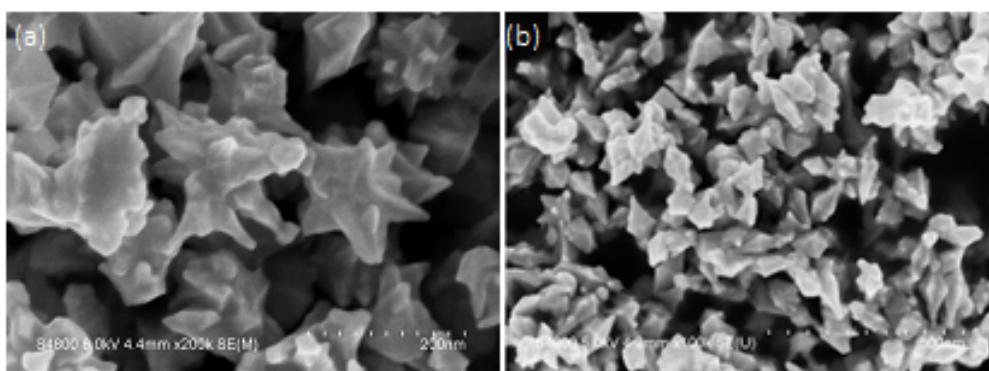

**Fig.S2** SEM images of BPGNs prepared by the multi-step growth methods in absence (a) and presence (b) of SDBS

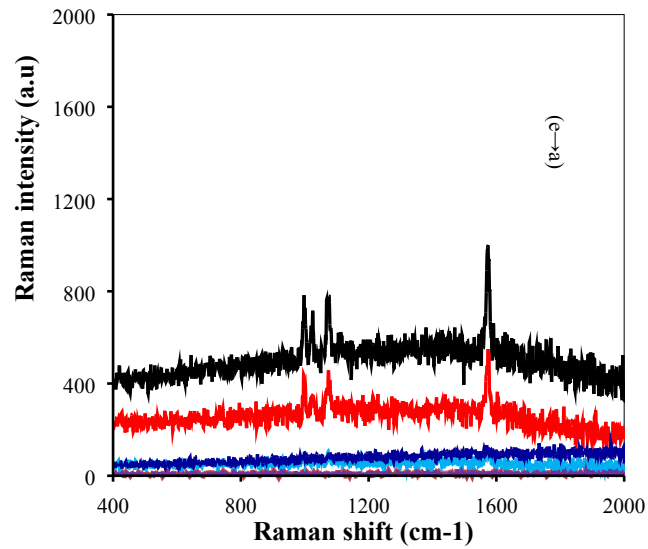

Fig.S3 SERS spectra of the BPGN/GNC with excitation wavelength at 532 nm using the excitation power of 0.001%, 0.05%, 0.1%, 0.5% and 1% total power (from a to e). The BPGN/GNC film was prepared by the method described in 2.5 section

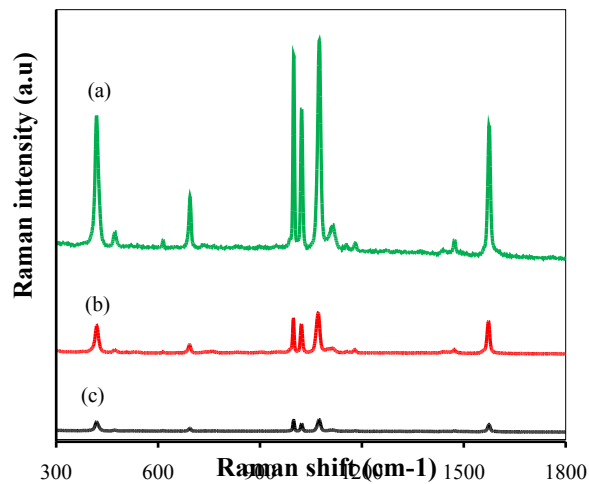

Fig.S4 SERS spectra of TP ( $5 \times 10^{-6}$  M) in a hybrid probe using BPGN (a), gold nanorods (b) and gold nanoparticles as SERS substrates (c) with excitation wavelength at 785 nm using the excitation power of 0.05% total power. The gold nanocrystal film was prepared by the same procedure described in 2.5 section

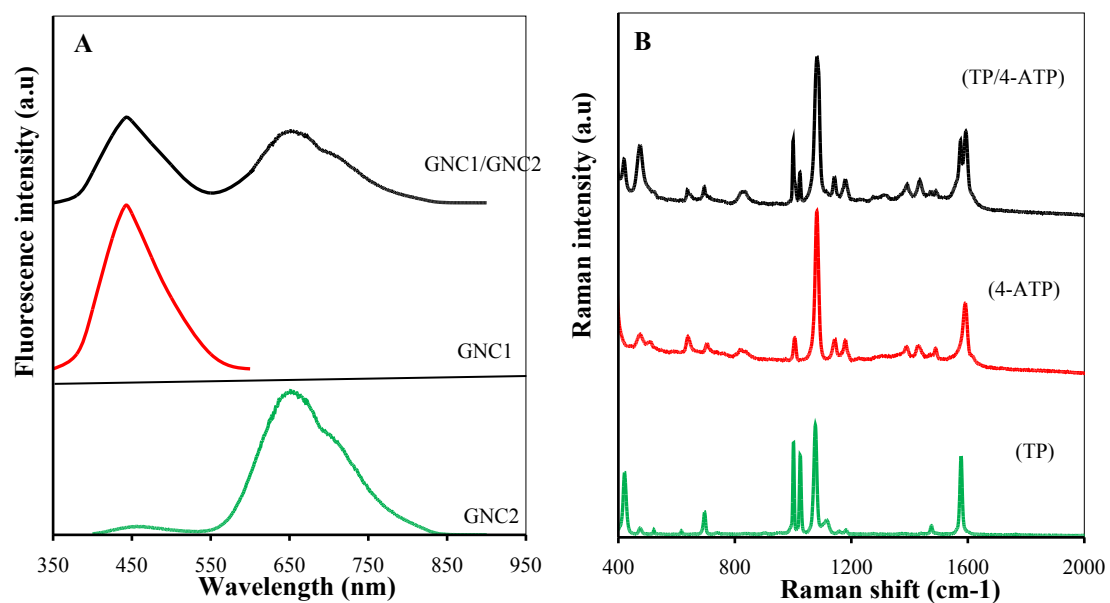

Fig.S5A: Fluorescence spectra of the probes conjugated with GNC<sub>1</sub>, GNC<sub>2</sub> and GNC<sub>1</sub>/GNC<sub>2</sub> with an excitation wavelength of 365 nm. B: SERS spectra of the probes conjugated with TP ( $5 \times 10^{-5}$  M), 4-ATP ( $5 \times 10^{-5}$  M) and TP/4-ATP ( $2.5 \times 10^{-5}$  M/ $2.5 \times 10^{-5}$  M) with an excitation wavelength of 785 nm using the excitation power of 0.05% total power
